# Supplementary material for: A Systematic Review of the Value Assessment Frameworks Used within Health Technology Assessment of Omics Technologies and Their Actual Adoption from HTA Agencies
Source: Int J Environ Res Public Health. 2020 Oct 30;17(21):8001. doi: 10.3390/ijerph17218001 (PMC7663163; doi:10.3390/ijerph17218001)
Supplement: Supplementary file 1 [file ijerph-17-08001-s001.pdf]

**Table 1.** Characteristics of the available forty-five Health Technology Assessment Reports on omics-technologies.

| Report name<br>[Reference]                                                                                                                             | Year of<br>publication | Agency                                                                                                  | Country        | Technology<br>Evaluated                                        | Framework<br>Reported | Health<br>Problem | Description<br>and<br>technical<br>characterist-<br>ics | Safet<br>y | Clinical<br>effectiv--<br>eness | Costs and<br>economic<br>valuation | Ethical<br>analysis | Organisational<br>aspects | Social<br>aspects |
|--------------------------------------------------------------------------------------------------------------------------------------------------------|------------------------|---------------------------------------------------------------------------------------------------------|----------------|----------------------------------------------------------------|-----------------------|-------------------|---------------------------------------------------------|------------|---------------------------------|------------------------------------|---------------------|---------------------------|-------------------|
| Clinical Applications<br>of Proteomic<br>Techniques [64]                                                                                               | 2006                   | Agencia de<br>Evaluación de<br>Tecnologías<br>Sanitarias de<br>Andalucía                                | Spain          | Proteomics                                                     | Not<br>Reported       | 1                 | 1                                                       | 0          | 1                               | 0                                  | 0                   | 0                         | 0                 |
| Prostate cancer gene 3<br>(Progensa PCA3)<br>assay in the diagnosis<br>of prostate cancer [72]                                                         | 2006                   | National<br>Horizon<br>Scanning<br>Center                                                               | UK             | The Progensa<br>PCA3                                           | Not<br>reported       | 0                 | 1                                                       | 1          | 1                               | 1                                  | 0                   | 0                         | 0                 |
| Genetic screening for<br>familial<br>hypercholesterolaemia<br>[70]                                                                                     | 2007                   | Australian<br>Safety and<br>Efficacy<br>Register of<br>New<br>Interventional<br>Procedures-<br>Surgical | Australia      | Genetic<br>screening                                           | Not<br>Reported       | 1                 | 1                                                       | 1          | 1                               | 1                                  | 1                   | 0                         | 0                 |
| Impact of gene<br>expression profiling<br>tests on breast cancer<br>outcomes [69]                                                                      | 2008                   | Agency for<br>Healthcare<br>Research and<br>Quality                                                     | USA            | Oncotype DX;<br>MammaPrint;<br>Breast Cancer<br>Profiling test | EGAPP                 | 1                 | 1                                                       | 1          | 1                               | 1                                  | 0                   | 0                         | 0                 |
| A comparison of Gene<br>Expression Profiling<br>tests for Breast cancer<br>[65]                                                                        | 2009                   | Health<br>Services<br>Assessment<br>Collaboration                                                       | New<br>Zealand | OncotypeDx,<br>Mammaprint                                      | Not<br>Reported       | 1                 | 1                                                       | 0          | 1                               | 1                                  | 0                   | 0                         | 0                 |
| MammaPrint®: in<br>vitro test for the<br>evaluation of<br>individual risk of<br>metastasis in<br>surgically treated<br>women for breast<br>cancer [67] | 2011                   | Agencia<br>sanitaria e<br>sociale<br>regionale-<br>Regione<br>Emilia-<br>Romagna                        | Italy          | Mammaprint                                                     | Not<br>Reported       | 0                 | 1                                                       | 1          | 1                               | 1                                  | 1                   | 1                         | 1                 |

|                                                                                                                                                                                                    |      |                                                                             |           |                                               |                                 |   |   |   |   |   |   |   |   |
|----------------------------------------------------------------------------------------------------------------------------------------------------------------------------------------------------|------|-----------------------------------------------------------------------------|-----------|-----------------------------------------------|---------------------------------|---|---|---|---|---|---|---|---|
| Economic assessment of genetic tests in mammary carcinoma cancer treatment [51]                                                                                                                    | 2011 | Health Technology Assessment Unit of Madrid                                 | Spain     | OncotypeDx, Mammaprint                        | Not Reported                    | 0 | 0 | 0 | 1 | 1 | 0 | 0 | 0 |
| Genetic testing for hereditary mutations in the VHL gene that cause von Hippel-Lindau syndrome [68]                                                                                                | 2012 | Adelaide Health Technology Assessment                                       | Australia | Genetic testing                               | Diagnostic assessment framework | 1 | 1 | 1 | 1 | 1 | 1 | 0 | 0 |
| Allomap™. Genetic test for cardiac transplant rejection. [66]                                                                                                                                      | 2012 | Agencia de Evaluación de Tecnologías Sanitarias de Andalucía                | Spain     | Allomap™                                      | Not Reported                    | 1 | 0 | 1 | 1 | 1 | 0 | 0 | 0 |
| Gene expression profiling and expanded immuno-histochemistry tests to guide the use of adjuvant chemotherapy in breast cancer management: a systematic review and cost-effectiveness analysis [43] | 2013 | National Institute for Health and Care Excellence (University of Sheffield) | UK        | OncotypeDx, Mammaprint, Endopredict, Prosigna | EGAPP                           | 1 | 0 | 0 | 1 | 1 | 0 | 0 | 0 |
| Importance of gene profiling tests in the choice of treatment for breast cancer [59]                                                                                                               | 2013 | finCCHTA                                                                    | Finland   | OncotypeDx, Mammaprint, Endopredict           | ACCE                            | 1 | 1 | 0 | 1 | 1 | 0 | 1 | 0 |
| Genetic testing for hereditary mutations in the RET gene [42]                                                                                                                                      | 2013 | Adelaide Health Technology Assessment                                       | Australia | Genetic testing                               | Diagnostic assessment framework | 1 | 1 | 1 | 1 | 1 | 1 | 1 | 0 |
| Use of OncotypeDX for guiding adjuvant chemotherapy decisions in early stage invasive breast cancer patients in Alberta [53]                                                                       | 2013 | Health Technology Assessment Unit of University of Alberta                  | Canada    | OncotypeDx                                    | Not Reported                    | 1 | 1 | 1 | 1 | 1 | 0 | 0 | 1 |

|                                                                                                                                                                          |      |                                                              |           |                             |              |   |   |   |   |   |   |   |   |
|--------------------------------------------------------------------------------------------------------------------------------------------------------------------------|------|--------------------------------------------------------------|-----------|-----------------------------|--------------|---|---|---|---|---|---|---|---|
| Prognostic genomic tests in early breast: MammaPrint® and Oncotype DX® [49]                                                                                              | 2014 | Agencia de Evaluación de Tecnologías Sanitarias de Andalucía | Spain     | MammaPrint; Oncotype DX     | Not Reported | 1 | 1 | 0 | 1 | 1 | 0 | 0 | 0 |
| Technology Assessment of Molecular Pathology Testing for the Estimation of Prognosis for Common Cancers [58]                                                             | 2014 | Agency for Healthcare Research and Quality                   | USA       | Molecular Pathology Testing | Not Reported | 1 | 1 | 1 | 1 | 1 | 1 | 1 | 1 |
| Gene expression profiling of 21 genes in breast cancer to quantify the risk of disease recurrence and predict adjuvant chemotherapy benefit [47]                         | 2014 | Medical Services Advisory Committee                          | Australia | OncotypeDx                  | Not Reported | 1 | 0 | 1 | 1 | 1 | 0 | 1 | 0 |
| Oncotype Dx in Women and Men with ER-Positive Her2 Negative Early Stage Breast Cancer Who are Lymph Node-Positive: A review of Clinical Effectiveness and Guidelines[54] | 2014 | Canadian Agency for Drugs and Technologies in Health         | Canada    | OncotypeDx                  | Not Reported | 0 | 0 | 0 | 1 | 0 | 0 | 0 | 0 |
| Next Generation DNA Sequencing, A review of the cost-effectiveness and Guidelines [63]                                                                                   | 2014 | Canadian Agency for Drugs and Technologies in Health         | Canada    | Next Generation Sequencing  | Not Reported | 0 | 0 | 0 | 1 | 1 | 0 | 0 | 0 |
| Second generation prognostic genomic tests in early breast cancer: EndoPredict® & Prosigna™ [62]                                                                         | 2015 | Agencia de Evaluación de Tecnologías Sanitarias de Andalucía | Spain     | EndoPredict®; Prosigna™     | Not Reported | 1 | 1 | 0 | 1 | 0 | 0 | 0 | 0 |

|                                                                                                                                                           |      |                                                                  |                 |                                                   |              |   |   |   |   |   |   |   |   |
|-----------------------------------------------------------------------------------------------------------------------------------------------------------|------|------------------------------------------------------------------|-----------------|---------------------------------------------------|--------------|---|---|---|---|---|---|---|---|
| Proteomanalyse im Urin zur Erkennung einer diabetischen Nephropathie bei Patientinnen und Patienten mit Diabetes mellitus und arteriellem Hypertonus [52] | 2015 | Institut für Qualität und Wirtschaftlichkeit im Gesundheitswesen | Germany         | Proteomics                                        | Not Reported | 1 | 1 | 0 | 1 | 0 | 0 | 0 | 0 |
| Next Generation Sequencing Gene panels for Targeted Therapy in Oncology and Haemato-Oncology [40]                                                         | 2015 | Belgian Health Care Knowledge Centre                             | Belgium         | Next Generation Sequencing / In (Hemato)-Oncology | Not reported | 0 | 1 | 1 | 1 | 1 | 0 | 1 | 1 |
| Gene Expression Profiling And Immunohistochemistry Tests For Personalised Management of Adjuvant Chemotherapy Decisions in Early Breast Cancer [71]       | 2015 | Belgian Health Care Knowledge Centre                             | Belgium         | OncotypeDx, Mammaprint                            | Not Reported | 1 | 1 | 1 | 1 | 1 | 0 | 0 | 0 |
| Next Generation sequencing in diagnostiek [50]                                                                                                            | 2015 | Health Council of the Netherlands                                | The Netherlands | Next Generation Sequencing                        | Not Reported | 1 | 1 | 0 | 0 | 1 | 1 | 1 | 0 |
| Gene sequencing of tumours: clinical validity and utility of molecular profiles obtained by next-generation sequencing technologies [56]                  | 2015 | l'Institut national d'excellence en santé et en services sociaux | Canada          | Next Generation Sequencing                        | ACCE         | 0 | 1 | 0 | 1 | 0 | 0 | 0 | 0 |

|                                                                                                                                                     |      |                                                                                   |         |                                                    |                     |   |   |   |   |   |   |   |   |
|-----------------------------------------------------------------------------------------------------------------------------------------------------|------|-----------------------------------------------------------------------------------|---------|----------------------------------------------------|---------------------|---|---|---|---|---|---|---|---|
| Using The Oncotype DX ® Assay For Therapeutic Decision Making In The Context Of Invasive Breast Cancer Treatment [57]                               | 2016 | l'Institut national d'excellence en santé et en services sociaux                  | Canada  | Oncotype DX                                        | Not Reported        | 0 | 1 | 0 | 1 | 1 | 0 | 0 | 0 |
| Biomarker-based tests for the decision for or against adjuvant systemic chemotherapy in primary breast cancer [77]                                  | 2016 | Institut für Qualität und Wirtschaftlichkeit im Gesundheitswesen                  | Germany | MAAA                                               | Not Reported        | 1 | 0 | 0 | 1 | 0 | 0 | 0 | 0 |
| Prenatal Diagnosis through Next Generation Sequencing [74]                                                                                          | 2016 | Swedish Agency for Health Technology Assessment and Assessment of Social Services | Sweden  | Next Generation Sequencing / In prenatal Screening | Not Reported        | 0 | 1 | 0 | 0 | 0 | 1 | 0 | 1 |
| HTA Report Next Generation Sequencing (NGS) [44]                                                                                                    | 2017 | Agenas                                                                            | Italy   | Next Generation Sequencing                         | Not Reported        | 1 | 1 | 1 | 1 | 1 | 1 | 1 | 1 |
| Genexpressiontest Mammaprint® [78]                                                                                                                  | 2017 | EUnetHTA Collaboration                                                            | EU      | Mammaprint                                         | EUnetHTA Core model | 1 | 1 | 1 | 1 | 0 | 0 | 0 | 0 |
| Utility of exome sequencing for diagnosed dysmorphic syndromes, with or without intellectual disabilities. Literature review Executive summary [39] | 2017 | Agencia de Evaluación de Tecnologías Sanitarias de Andalucía                      | Spain   | Exome Sequencing                                   | Not Reported        | 0 | 0 | 0 | 0 | 0 | 1 | 1 | 0 |

|                                                                                                                                    |      |                                                                   |         |                                                   |              |   |   |   |   |   |   |   |   |
|------------------------------------------------------------------------------------------------------------------------------------|------|-------------------------------------------------------------------|---------|---------------------------------------------------|--------------|---|---|---|---|---|---|---|---|
| Molecular testing for Lynch syndrome in people with colorectal cancer: systematic reviews and economic evaluation [75]             | 2017 | National Horizon Scanning Center                                  | UK      | Microsatellite instability testing                | EGAPP        | 1 | 1 | 1 | 0 | 1 | 0 | 0 | 0 |
| Pharmacogenomic Testing for Psychotropic Medication Selection: A Systematic Review of the Assurex GeneSight Psychotropic Test [83] | 2017 | Ontario Health Quality                                            | Canada  | Pharmacogenomic testing                           | Not Reported | 1 | 1 | 0 | 1 | 0 | 0 | 0 | 0 |
| Prognostic genomic tests in early breast cancer: up-date of evidence. Executive summary [76]                                       | 2018 | Agencia de Evaluación de Tecnologías Sanitarias de Andalucía      | Spain   | MammaPrint, Oncotype DX, EndoPredict and Prosigna | Not reported | 0 | 0 | 1 | 1 | 0 | 0 | 0 | 0 |
| Use Of Endopredict And Prosigna In Early Invasive Breast Cancer [46]                                                               | 2018 | l'Institut national d'excellence en santé et en services sociaux. | Canada  | Endopredict, Prosigna                             | EGAPP        | 0 | 1 | 0 | 1 | 1 | 0 | 0 | 0 |
| Mammaprint Test for personalised management of adjuvant chemotherapy decisions in early breast cancer [45]                         | 2018 | Belgian Health Care Knowledge Centre                              | Belgium | Mammaprint                                        | Not Reported | 1 | 0 | 1 | 1 | 1 | 0 | 1 | 0 |
| The use of whole genome sequencing in clinical practice: Challenges and organisational considerations for Belgium [41]             | 2018 | Belgian Health Care Knowledge Centre                              | Belgium | Whole Genome Sequencing                           | Not Reported | 0 | 1 | 0 | 0 | 1 | 0 | 1 | 0 |

|                                                                                                                       |      |                                                                                                      |         |                                                                                   |              |   |   |   |   |   |   |   |   |
|-----------------------------------------------------------------------------------------------------------------------|------|------------------------------------------------------------------------------------------------------|---------|-----------------------------------------------------------------------------------|--------------|---|---|---|---|---|---|---|---|
| FoundationOne® CDx: genetic profiling of solid tumours [82]                                                           | 2019 | Ludwig Boltzmann Institut                                                                            | Austria | Next-Generation Sequencing                                                        | Not Reported | 1 | 0 | 0 | 0 | 1 | 0 | 0 | 0 |
| Rapid Genome-wide Testing: Clinical Utility and Cost-Effectiveness [48]                                               | 2019 | Canadian Agency for Drugs and Technologies in Health                                                 | Canada  | Genome-wide Testing                                                               | Not Reported | 0 | 0 | 0 | 1 | 1 | 0 | 0 | 0 |
| Complete sequencing of the Exome for Etiological Investigation of intellectual disability of Indeterminate cause [73] | 2019 | Conitec                                                                                              | Brasil  | Sequenciamento de nova geração – sequenciamento completo do exoma                 | Not Reported | 0 | 1 | 0 | 1 | 1 | 0 | 0 | 0 |
| Clinical utility of genomic signature in Early-stage breast cancer [47]                                               | 2019 | Haute autorité de santé                                                                              | France  | MAAA                                                                              | Not Reported | 0 | 1 | 0 | 1 | 0 | 0 | 0 | 1 |
| Prosigna Gene Signature to Assess Expected Benefit from Chemotherapy in Breast Cancer [60]                            | 2019 | Norwegian Institute of Public Health                                                                 | Norway  | Prosigna                                                                          | Not Reported | 1 | 1 | 1 | 1 | 1 | 0 | 1 | 0 |
| Three biomarker tests to help diagnose preterm labour: a systematic review and economic evaluation [80]               | 2019 | National Institute for Health Research                                                               | UK      | Diagnostic tests PartoSur; Actim Partus; Rapid Fetal Fibronectin 10Q Cassette Kit | Not Reported | 1 | 1 | 1 | 1 | 1 | 0 | 0 | 0 |
| Gene Expression Profiling Tests for Early-Stage Invasive Breast Cancer: A Health Technology Assessment [61]           | 2020 | Canadian Agency for Drugs and Technologies in Health AND Ontario Health Technology Assessment Series | Canada  | OncotypeDx, MammaPrint, Endopredict, Prosigna                                     | Not Reported | 1 | 0 | 1 | 1 | 1 | 0 | 1 | 0 |

|                                                                                                                                         |      |                                                              |        |                              |              |    |    |    |    |    |    |    |   |
|-----------------------------------------------------------------------------------------------------------------------------------------|------|--------------------------------------------------------------|--------|------------------------------|--------------|----|----|----|----|----|----|----|---|
| Genetic risk prediction test for cardiovascular disease [79]                                                                            | 2020 | Agencia de Evaluación de Tecnologías Sanitarias de Andalucía | Spain  | Genetic risk prediction test | Not reported | 1  | 1  | 1  | 1  | 1  | 1  | 1  | 0 |
| Genome-Wide Sequencing for Unexplained Developmental Disabilities or Multiple Congenital Anomalies: A Health Technology Assessment [81] | 2020 | Ontario Health Quality                                       | Canada | Genome-Wide Sequencing       | Not Reported | 1  | 1  | 1  | 1  | 1  | 0  | 0  | 0 |
| Total (45)                                                                                                                              |      |                                                              |        |                              |              | 28 | 31 | 22 | 38 | 33 | 10 | 14 | 7 |

*Abbreviations:* ACCE: Analytic validity, Clinical validity, Clinical utility, Ethical, legal and social implications; EGAPP: Evaluation of Genomic Applications in Practice and Prevention; MAAA: multianalyte assays with algorithmic analysis;
